# Supplementary material
Source: PubMed Central journal article supplement (PMC6859339)
Supplement: pnas.1913534116.sapp.pdf [file pnas.1913534116.sapp.pdf]

# PNAS

www.pnas.org

1  
2  
3  
4  
5  
6  
7  
8  
9  
10  
11  
12  
13  
14  
15  
16  
17  
18  
19  
20  
21  
22  
23  
24  
25  
26  
27  
28  
29  
30  
31  
32  
33  
34  
35

Supplementary Information for

**Hybridization and population variation during an adaptive radiation**

**Peter R. Grant and B. Rosemary Grant**

Corresponding author

**Peter R. Grant**

Email: [prgrant@princeton.edu](mailto:prgrant@princeton.edu)

**This PDF file includes:**

Supplementary text  
Fig. S1-S3  
Tables S1-S2  
Captions for databases S1 to S3  
References for SI reference citations

**Other supplementary materials for this manuscript include the following:**

Datasets S1 to S3

# Hybridization and population variation during an adaptive radiation

Peter R. Grant and B. Rosemary Grant

## Section 1 Hybridization and mate choice

Mates are chosen on the basis of morphological and song cues learned in early life by imprinting on parents (1-3). *G. fortis* and *G. scandens* on Daphne Major Island differ in beak proportions and in song. Why, then, do finches mate with members of another species? We identified two causes of interbreeding. First, it arises when the normal imprinting process is perturbed, for example through the death of the father during the period of parental dependence as nestlings or fledglings. The young birds may then learn the song of a territorial neighbor of another species (2, 4). Second, interbreeding occurs through extra-pair mating (EPM). Three of six hybrids that could be checked for paternity by DNA were the product of EPM (5). Although the sample size is small, the fraction (0.5) is significantly higher than the fraction expected (0.23) based on 93 EPMs of 488 matings (both species combined) with identified paternity (5). Extra-pair mating is an opportunistic behavior, and not known to be adaptive (6). The frequency is 0.171 in *G. fortis* ( $n = 1,248$  chicks) and 0.103 in *G. scandens* ( $n = 368$  chicks). The incidence of heterospecific EPM is relatively high because courtship, involving species-specific signals and responses, is likely to be minimal or absent.

## Section 2 Hybridization of *G. fuliginosa* and *G. fortis*

*G. fuliginosa* numbers varied in the annual samples of measured birds from 0 to 22 (mean  $5.8 \pm 0.07$ ) in the years 1978 to 2012. Not all were breeders, and the few that bred hybridized with *G. fortis* and not with *G. scandens* or *G. magnirostris*. Numbers of admixed individuals of *G. fortis* and *G. fuliginosa* are much larger over the same time period, from 0 to 62, but when combined with *G. fortis* individuals their proportions are only 0-0.19 (mean  $0.08 \pm 0.01$  SE). Proportions fluctuated but with no net change (Fig. S1).

1

## 2 **Section 3 Variances**

3 Annual estimates of variances of beak lengths and beak depths are shown in Fig. S2. The  
4 *G. fortis* variances fluctuated synchronously without a net increase or decrease across 38  
5 years. Beak depth variances of *G. scandens* remained stable throughout and consistently  
6 lower than beak length variances. In contrast to beak depth, beak length variance of *G.*  
7 *scandens* increased strongly in 1991 and remained stable at the elevated level until 1999,  
8 when it fell to the previous level and remained there. Beak length variance was  
9 consistently higher than beak depth variance in this species, but not in *G. fortis*.

10

11 Coefficients of variation scale the variances by the mean. These are reported in the main  
12 text. Annual variation in the *G. fortis* coefficients almost exactly parallels the annual  
13 variation in variances. Coefficients for *G. scandens* beak depth increase after 1998, and  
14 thereby differ from the temporarily stable variances.

15

## 16 **Section 4 Skewness**

17 Frequency distributions are predicted to be right-skewed, positively, in *G. fortis* towards  
18 the larger species, and left-skewed, negatively, in *G. scandens* (8). Most skew estimates  
19 match the predictions (Fig. S3). Skewness values in *G. fortis* remained stable in the range  
20 0 to +0.4 until 1997 when an upward trend towards more positive values began in both of  
21 the strongly covarying beak traits. The late increase is a signature of possible  
22 introgression without a counterpart in CVs. The two beak traits of *G. scandens* differed in  
23 skewness. Beak depth values varied in the range -0.5 to +0.5 with an average of  $+0.09 \pm$   
24  $0.05$  (SE) and no net change, whereas skewness in the beak length distribution became  
25 strongly negative in 1986, and only returned to the pre-1986 level in 2002. The temporal  
26 pattern of beak length skewness parallels the pattern of change in CVs.

27

## 28 **Section 5 Museum specimens**

29 David Lack (7) measured male and female specimens from Museums. Relying on  
30 information on the labels and plumage indications of juveniles, he calculated means and

1 standard deviations for single sex samples of adults. We have calculated coefficients of  
2 variation and associated confidence limits (Table S1 and Table S2). With few exceptions  
3 we have used his samples of only males because they outnumber females in all but seven  
4 of the 99 island population samples. The alternative to single-sex analysis is a weighted  
5 average of the coefficients of variation for males and females, calculated by multiplying  
6 each by their respective sample sizes, adding the products and dividing by the combined  
7 sample size. We chose not to do this because it is likely to increase the uncertainty of the  
8 estimate of the coefficients, even though this may be offset by the increased sample size.  
9 However, for samples of males under 10 we have combined male and female samples in  
10 the manner indicated above. None of these are significantly different from zero. Lack (7)  
11 was unable to reliably measure beak depth of *Certhidea* specimens.

12

13 Ian Abbott (in reference 9) measured the same *Geospiza* specimens from Museums. We  
14 have not used those measurements here for two reasons. First, he measured only  
15 *Geospiza* specimens. Second, he measured the upper mandible, and we consider this to be  
16 less replicable than total beak depth as measured by Lack (7). However, Lack's and  
17 Abbott's measurements of *Geospiza* mean beak length are perfectly correlated ( $r = 1.0$ ).

18

## 19 **Section 6 Ambiguous pattern of variation**

20 *G. magnirostris* coexists on Darwin with only one resident species, the much smaller *G.*  
21 *septentrionalis*. The coefficient of beak depth variation is exceptionally large (13.13) and  
22 conspicuously larger than any other (main text, Table 2). This might be the result of  
23 interbreeding with *G. septentrionalis*, resulting in a small swarm of hybrids. Consistent  
24 with this explanation, the two species differ much less in beak length (32.7 percent), a  
25 less varying dimension, than in beak depth (83.3 percent). Alternatively, the sample  
26 might be a mixture of resident *G. magnirostris* and immigrant *G. conirostris* or *G.*  
27 *propinqua* (8, 10 – 12). The situation appears to have been ephemeral. On a visit in  
28 January 1997 we saw and tape-recorded singing *G. magnirostris* but saw no sign of  
29 unusual morphological variants. The population appears to be very rare.

30

31

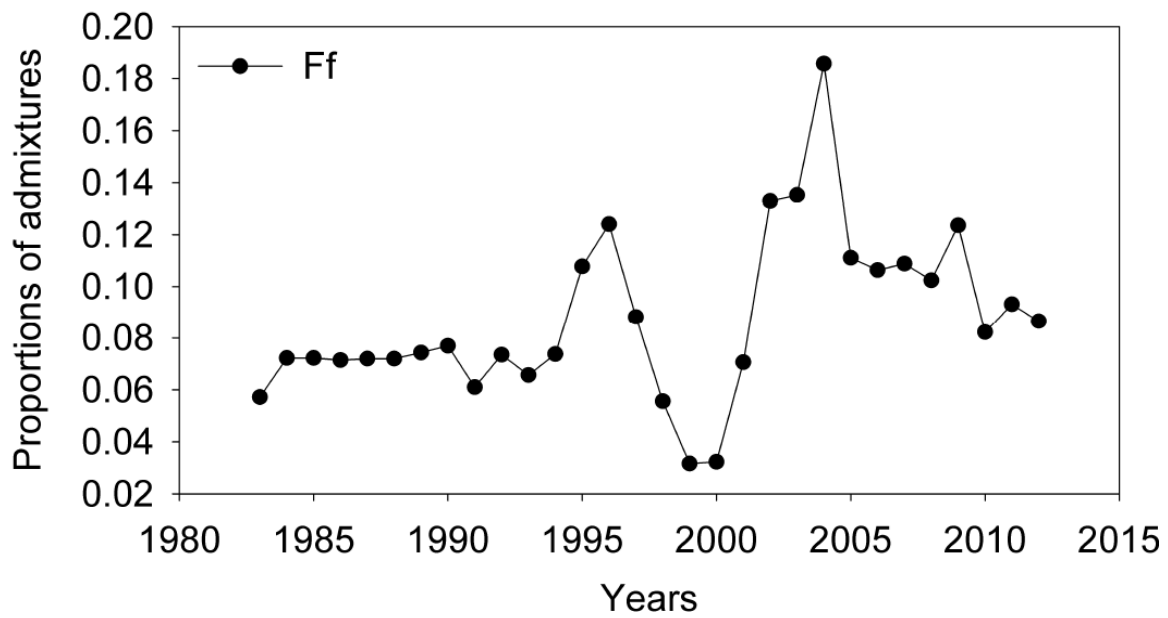

1  
2  
3  
4  
5

**Fig. S1.** The proportion of admixed individuals (*G. fuliginosa* and *G. fortis*) in the total sample of *G. fortis*.

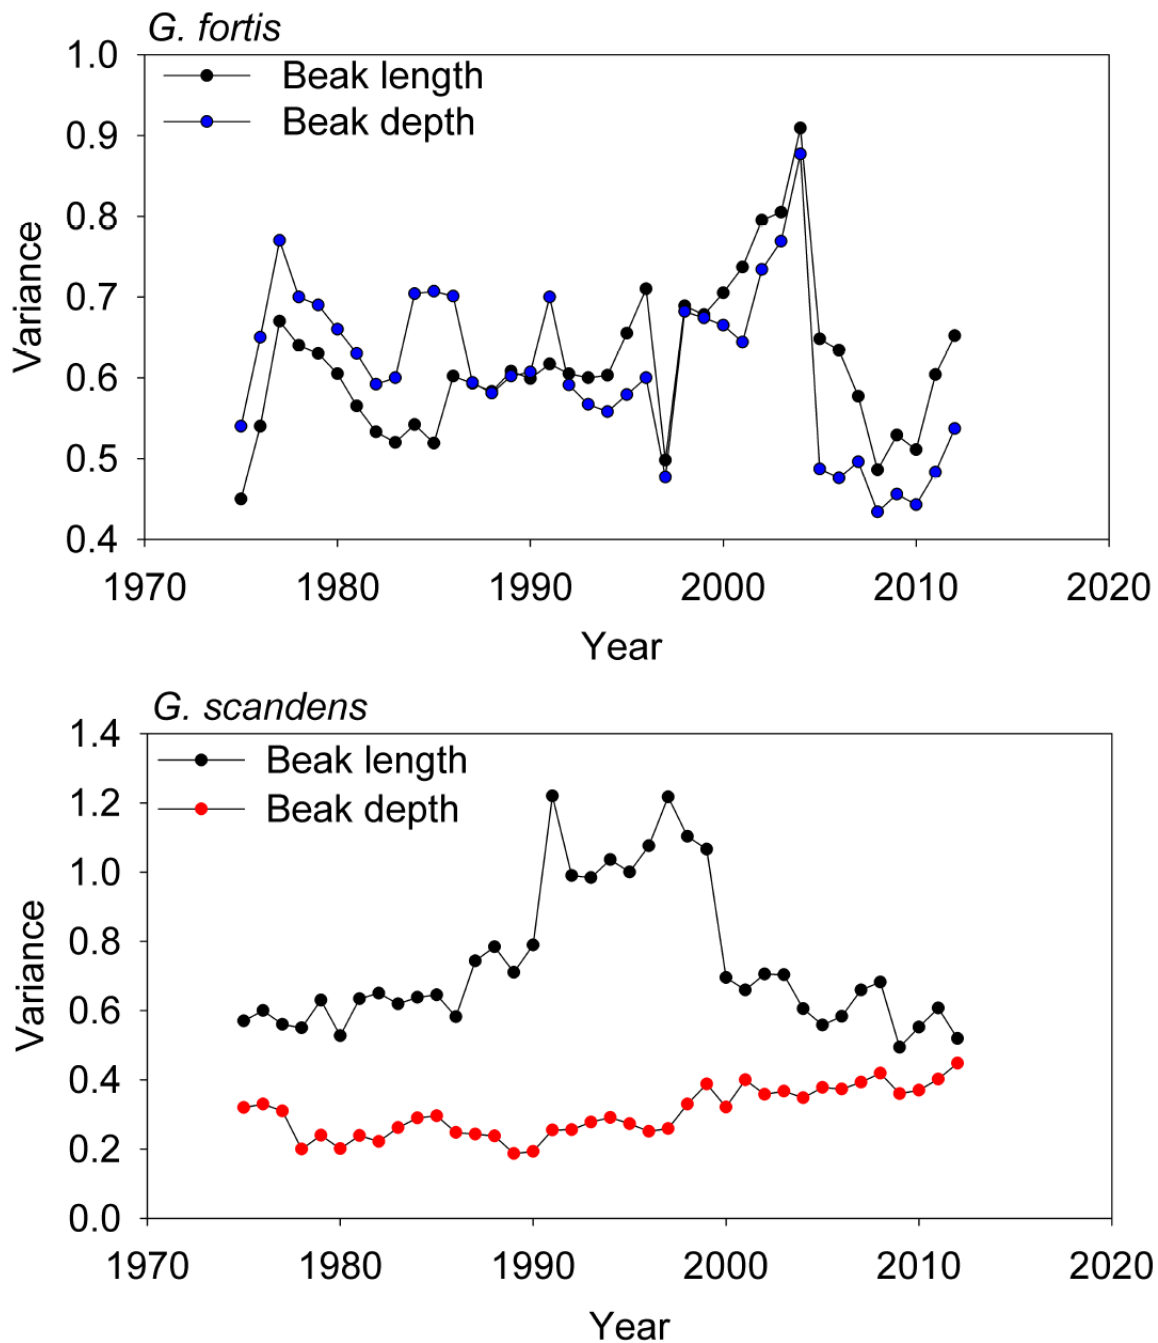

1  
 2 **Fig. S2.** Annual estimates of variances of beak lengths and beak depths of *G. fortis* and  
 3 *G. scandens*.  
 4  
 5  
 6

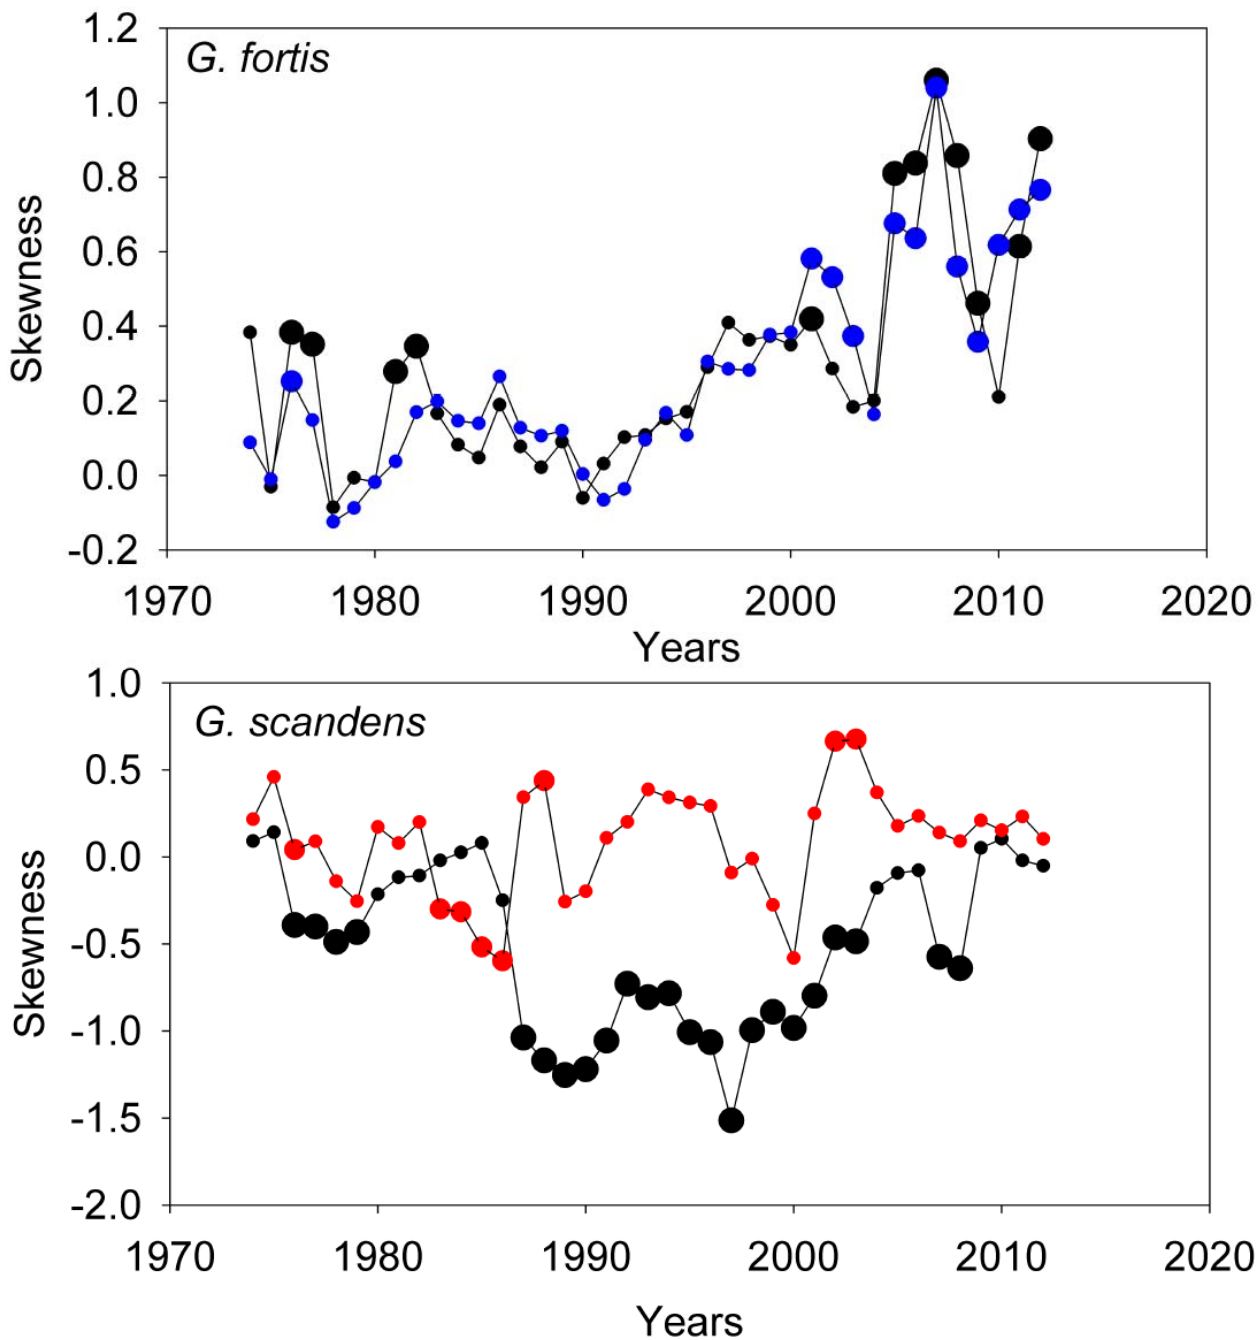

1  
2  
3  
4  
5  
6

Fig. S3 Changes in skewness in frequency distributions of beak length (black) and beak depth (colored). Skewness estimates ( $g_1$ ) that are significantly different from zero ( $P < 0.05$ ) are indicated by large symbols.

1

2 **Table S1.** Coefficients of variation (CV) of beak length, and upper and lower 95-percent  
3 confidence limits (CL). Adult male samples only, except for a few indicated by an asterisk, where  
4 a small sample of males (<10) has been combined with females, with appropriate weighting by  
5 sample size. All species with the first letter *G* are members of the genus *Geospiza*. Other genera  
6 are *Platyspiza* (*crassirostris*), *Pinaroloxias* (*inornata*), *Certhidea* (*fusca* and *olivacea*) and  
7 *Camarhynchus* (all others). Original data in reference 7.

8

| Species                | Island        | Sample ( <i>n</i> ) | Mean  | Variation (CV) | Lower CL | Upper CL |
|------------------------|---------------|---------------------|-------|----------------|----------|----------|
| <i>G. magnirostris</i> | Darwin        | 17                  | 14.99 | 5.831          | 3.734    | 8.099    |
| <i>G. magnirostris</i> | Wolf          | 10                  | 15.65 | 4.064          | 2.006    | 6.325    |
| <i>G. magnirostris</i> | Genovesa      | 29                  | 16.52 | 3.626          | 2.665    | 4.649    |
| <i>G. magnirostris</i> | Pinta         | 50                  | 16.04 | 4.096          | 3.285    | 4.948    |
| <i>G. magnirostris</i> | Marchena      | 41                  | 15.19 | 5.069          | 3.955    | 6.245    |
| <i>G. magnirostris</i> | Santiago      | 46                  | 15.91 | 4.412          | 3.499    | 5.373    |
| <i>G. magnirostris</i> | Rábida        | 35                  | 15.29 | 4.709          | 3.593    | 5.892    |
| <i>G. magnirostris</i> | Santa Cruz    | 13                  | 15.28 | 5.229          | 3.008    | 7.661    |
| <i>G. fortis</i>       | Pinta         | 48                  | 11.25 | 4.542          | 3.622    | 5.510    |
| <i>G. fortis</i>       | Marchena      | 36                  | 11.66 | 4.031          | 3.081    | 5.037    |
| <i>G. fortis</i>       | Santiago      | 46                  | 11.49 | 4.839          | 3.838    | 5.893    |
| <i>G. fortis</i>       | Rábida        | 10                  | 11.52 | 3.273          | 1.165    | 5.093    |
| <i>G. fortis</i>       | Seymour       | 26                  | 11.69 | 6.672          | 4.794    | 8.679    |
| <i>G. fortis</i>       | Santa Cruz    | 105                 | 11.95 | 6.770          | 5.852    | 7.720    |
| <i>G. fortis</i>       | Pinzón        | 30                  | 11.26 | 6.465          | 4.784    | 8.255    |
| <i>G. fortis</i>       | Fernandina    | 15                  | 11.55 | 4.165          | 2.548    | 5.920    |
| <i>G. fortis</i>       | N. Isabela    | 65                  | 11.49 | 6.319          | 5.226    | 7.460    |
| <i>G. fortis</i>       | S. Isabela    | 70                  | 12.45 | 6.675          | 5.562    | 7.835    |
| <i>G. fortis</i>       | San Cristóbal | 109                 | 12.20 | 5.475          | 4.747    | 6.229    |
| <i>G. fortis</i>       | Floreana      | 181                 | 11.65 | 7.579          | 6.799    | 8.381    |
| <i>G. fortis</i>       | Daphne        | 31                  | 10.51 | 5.157          | 3.840    | 6.558    |
| <i>G. fuliginosa</i>   | Pinta         | 48                  | 8.22  | 4.720          | 3.765    | 5.725    |
| <i>G. fuliginosa</i>   | Marchena      | 24                  | 8.08  | 4.889          | 3.449    | 6.430    |
| <i>G. fuliginosa</i>   | Santiago      | 23                  | 8.43  | 4.555          | 3.181    | 6.028    |
| <i>G. fuliginosa</i>   | Rábida        | 12                  | 8.48  | 5.660          | 3.128    | 8.428    |
| <i>G. fuliginosa</i>   | Seymour       | 45                  | 8.60  | 4.151          | 3.281    | 5.068    |
| <i>G. fuliginosa</i>   | Santa Cruz    | 80                  | 8.42  | 4.466          | 3.769    | 5.190    |
| <i>G. fuliginosa</i>   | Pinzón        | 84                  | 8.59  | 4.750          | 4.027    | 5.501    |
| <i>G. fuliginosa</i>   | Fernandina    | 19                  | 8.07  | 3.234          | 2.145    | 4.408    |
| <i>G. fuliginosa</i>   | N. Isabela    | 87                  | 8.31  | 4.356          | 3.704    | 5.033    |
| <i>G. fuliginosa</i>   | S. Isabela    | 63                  | 8.43  | 4.496          | 3.706    | 5.321    |
| <i>G. fuliginosa</i>   | Santa Fé      | 41                  | 8.76  | 4.224          | 3.295    | 5.204    |
| <i>G. fuliginosa</i>   | San Cristóbal | 125                 | 8.79  | 7.702          | 6.744    | 8.691    |
| <i>G. fuliginosa</i>   | Española      | 32                  | 8.78  | 4.112          | 3.078    | 5.209    |
| <i>G. fuliginosa</i>   | Gardner*      | 14                  | 8.49  | 5.823          | 3.464    | 8.390    |



|                           |                |     |       |       |       |        |
|---------------------------|----------------|-----|-------|-------|-------|--------|
| <i>G. fuliginosa</i>      | Floreana       | 86  | 8.59  | 4.622 | 3.926 | 5.344  |
| <i>G. fuliginosa</i>      | Los Hermanos   | 12  | 9.32  | 9.367 | 5.177 | 13.948 |
| <i>G. septentrionalis</i> | Darwin         | 32  | 11.32 | 3.763 | 2.817 | 4.768  |
| <i>G. septentrionalis</i> | Wolf           | 67  | 10.67 | 3.899 | 3.235 | 4.592  |
| <i>G. acutirostris</i>    | Genovesa       | 52  | 9.42  | 4.002 | 3.225 | 4.818  |
| <i>G. difficilis</i>      | Pinta          | 18  | 9.67  | 3.154 | 2.058 | 4.338  |
| <i>G. difficilis</i>      | Santiago       | 44  | 10.25 | 3.776 | 2.976 | 4.618  |
| <i>G. difficilis</i>      | Santa Cruz     | 33  | 9.60  | 3.333 | 2.509 | 4.208  |
| <i>G. scandens</i>        | Pinta          | 17  | 14.55 | 4.137 | 2.649 | 5.747  |
| <i>G. scandens</i>        | Marchena*      | 22  | 14.80 | 4.045 | 2.794 | 5.389  |
| <i>G. scandens</i>        | Santiago       | 23  | 12.92 | 3.839 | 2.681 | 5.080  |
| <i>G. scandens</i>        | Rábida         | 15  | 13.63 | 4.644 | 2.842 | 6.601  |
| <i>G. scandens</i>        | Seymour        | 40  | 14.74 | 4.864 | 3.782 | 6.008  |
| <i>G. scandens</i>        | Santa Cruz     | 87  | 14.95 | 5.130 | 4.363 | 5.928  |
| <i>G. scandens</i>        | Pinzón*        | 18  | 14.46 | 4.756 | 3.103 | 6.542  |
| <i>G. scandens</i>        | S. Isabela     | 16  | 14.64 | 4.816 | 3.020 | 6.762  |
| <i>G. scandens</i>        | Santa Fe       | 61  | 14.40 | 4.889 | 4.016 | 5.801  |
| <i>G. scandens</i>        | San Cristóbal* | 15  | 12.86 | 6.112 | 3.740 | 8.688  |
| <i>G. scandens</i>        | Floreana       | 102 | 13.88 | 4.452 | 3.840 | 5.087  |
| <i>G. propinqua</i>       | Genovesa       | 43  | 14.35 | 5.310 | 4.172 | 6.510  |
| <i>G. conirostris</i>     | Española       | 87  | 15.43 | 6.079 | 5.170 | 7.024  |
| <i>G. conirostris</i>     | Gardner        | 72  | 14.64 | 6.742 | 5.634 | 7.897  |
| <i>P. crassirostris</i>   | Pinta          | 16  | 10.43 | 3.816 | 2.393 | 5.358  |
| <i>P. crassirostris</i>   | Marchena*      | 19  | 10.36 | 3.075 | 2.040 | 4.192  |
| <i>P. crassirostris</i>   | Santiago       | 26  | 10.55 | 3.242 | 2.329 | 4.217  |
| <i>P. crassirostris</i>   | Santa Cruz     | 28  | 10.43 | 2.704 | 1.973 | 3.483  |
| <i>P. crassirostris</i>   | S. Isabela     | 56  | 10.26 | 2.768 | 2.253 | 3.308  |
| <i>P. crassirostris</i>   | San Cristóbal  | 37  | 10.47 | 3.047 | 2.339 | 3.795  |
| <i>P. crassirostris</i>   | Floreana       | 24  | 10.69 | 3.302 | 2.330 | 4.343  |
| <i>P. inornata</i>        | Cocos          | 124 | 10.41 | 3.660 | 3.203 | 4.132  |
| <i>C. pauper</i>          | Floreana       | 80  | 9.02  | 4.479 | 3.780 | 5.206  |
| <i>C. heliobates</i>      | Isabela        | 32  | 10.49 | 4.480 | 3.353 | 5.678  |
| <i>C. psittacula</i>      | Pinta          | 18  | 10.13 | 3.277 | 2.138 | 4.508  |
| <i>C. psittacula</i>      | Marchena       | 24  | 10.49 | 3.603 | 2.542 | 4.740  |
| <i>C. psittacula</i>      | Santiago       | 17  | 9.84  | 3.394 | 2.174 | 4.715  |
| <i>C. psittacula</i>      | Santa Cruz*    | 18  | 9.41  | 4.381 | 2.858 | 6.025  |
| <i>C. psittacula</i>      | N. Isabela*    | 10  | 8.44  | 4.007 | 1.978 | 6.237  |
| <i>C. psittacula</i>      | S. Isabela     | 17  | 8.53  | 4.865 | 3.115 | 6.758  |
| <i>C. psittacula</i>      | Floreana*      | 17  | 9.57  | 2.298 | 1.472 | 3.192  |
| <i>C. parvulus</i>        | Santiago       | 28  | 6.95  | 2.863 | 2.090 | 3.688  |
| <i>C. parvulus</i>        | Santa Cruz     | 19  | 7.49  | 5.915 | 3.923 | 8.062  |
| <i>C. parvulus</i>        | N. Isabela     | 14  | 6.97  | 3.099 | 1.844 | 4.465  |
| <i>C. parvulus</i>        | S. Isabela     | 24  | 7.28  | 4.451 | 3.140 | 5.854  |
| <i>C. parvulus</i>        | Floreana       | 86  | 7.33  | 4.052 | 3.442 | 4.685  |
| <i>C. parvulus</i>        | San Cristóbal  | 91  | 7.96  | 3.894 | 3.325 | 4.486  |
| <i>C. pallidus</i>        | Santiago       | 13  | 12.56 | 4.084 | 2.350 | 5.976  |
| <i>C. pallidus</i>        | Santa Cruz*    | 21  | 12.04 | 2.888 | 1.970 | 3.874  |
| <i>C. pallidus</i>        | S. Isabela     | 53  | 11.24 | 3.843 | 3.081 | 4.642  |
| <i>C. fusca</i>           | Darwin*        | 19  | 8.36  | 1.860 | 1.234 | 2.535  |

|                    |               |    |      |       |       |       |
|--------------------|---------------|----|------|-------|-------|-------|
| <i>C. fusca</i>    | Wolf*         | 14 | 7.94 | 5.924 | 3.524 | 8.535 |
| <i>C. fusca</i>    | Genovesa      | 41 | 8.18 | 2.518 | 1.965 | 3.103 |
| <i>C. fusca</i>    | Pinta         | 17 | 8.10 | 2.827 | 1.810 | 3.927 |
| <i>C. fusca</i>    | Marchena      | 18 | 8.20 | 3.780 | 2.466 | 5.200 |
| <i>C. fusca</i>    | Pinzón        | 21 | 7.56 | 6.151 | 4.197 | 8.251 |
| <i>C. fusca</i>    | Santa Fé      | 40 | 7.92 | 3.788 | 2.945 | 4.679 |
| <i>C. fusca</i>    | San Cristóbal | 46 | 7.89 | 4.347 | 3.448 | 5.294 |
| <i>C. fusca</i>    | Española      | 44 | 8.02 | 3.429 | 2.703 | 4.194 |
| <i>C. fusca</i>    | Gardner       | 43 | 8.00 | 3.625 | 2.844 | 4.448 |
| <i>C. fusca</i>    | Floreana      | 25 | 7.74 | 3.747 | 2.669 | 4.900 |
| <i>C. olivacea</i> | Santiago      | 31 | 7.30 | 3.836 | 2.856 | 4.877 |
| <i>C. olivacea</i> | Santa Cruz    | 44 | 7.60 | 4.474 | 3.526 | 5.472 |
| <i>C. olivacea</i> | Fernandina    | 10 | 7.30 | 2.877 | 1.420 | 4.477 |
| <i>C. olivacea</i> | N. Isabela    | 20 | 7.30 | 3.973 | 2.675 | 5.370 |
| <i>C. olivacea</i> | S. Isabela    | 28 | 7.50 | 4.533 | 3.308 | 5.839 |

1  
2  
3  
4  
5  
6  
7  
8  
9  
10  
11  
12  
13  
14  
15  
16  
17  
18  
19

1

2

3

4

5

6 **Table S2.** Coefficients of variation (CV) of beak depth, and upper and lower 95-percent  
7 confidence limits (CL). Adult male samples only, except for a few indicated by an asterisk, where  
8 a small sample of males (<10) has been combined with females, with appropriate weighting by  
9 sample size. All species with the first letter *G* are members of the genus *Geospiza*. Other genera  
10 are *Platyspiza (crassirostris)*, *Pinaroloxias (inornata)*, *Certhidea (fusca and olivacea )* and  
11 *Camarhynchus* (all others). Original data in reference 7.

12

13

| Species                | Island        | Sample (n) | Mean  | Variation (CV) | Lower CL | Upper CL |
|------------------------|---------------|------------|-------|----------------|----------|----------|
| <i>G. magnirostris</i> | Darwin        | 16         | 16.53 | 13.134         | 8.235    | 18.442   |
| <i>G. magnirostris</i> | Wolf          | 9          | 20.44 | 4.344          | 1.971    | 6.959    |
| <i>G. magnirostris</i> | Genovesa      | 24         | 21.21 | 5.314          | 3.749    | 6.989    |
| <i>G. magnirostris</i> | Pinta         | 47         | 20.01 | 4.703          | 3.741    | 5.714    |
| <i>G. magnirostris</i> | Marchena      | 40         | 19.10 | 4.995          | 3.884    | 6.168    |
| <i>G. magnirostris</i> | Santiago      | 43         | 20.50 | 5.000          | 3.928    | 6.130    |
| <i>G. magnirostris</i> | Rábida        | 33         | 18.56 | 5.749          | 4.328    | 7.257    |
| <i>G. magnirostris</i> | Santa Cruz    | 14         | 19.11 | 9.173          | 5.458    | 13.216   |
| <i>G. fortis</i>       | Pinta         | 42         | 11.82 | 5.592          | 4.378    | 6.873    |
| <i>G. fortis</i>       | Marchena      | 35         | 12.11 | 3.386          | 2.582    | 4.237    |
| <i>G. fortis</i>       | Santiago      | 43         | 12.50 | 5.712          | 4.488    | 7.003    |
| <i>G. fortis</i>       | Rábida        | 8          | 12.56 | 4.522          | 1.820    | 7.507    |
| <i>G. fortis</i>       | Seymour       | 24         | 12.55 | 7.625          | 5.380    | 10.030   |
| <i>G. fortis</i>       | Santa Cruz    | 100        | 12.82 | 10.304         | 8.873    | 11.787   |
| <i>G. fortis</i>       | Pinzón        | 25         | 11.46 | 7.522          | 5.357    | 9.837    |
| <i>G. fortis</i>       | Fernandina    | 15         | 12.30 | 4.195          | 2.567    | 5.963    |
| <i>G. fortis</i>       | N. Isabela    | 64         | 12.41 | 8.501          | 7.020    | 10.049   |
| <i>G. fortis</i>       | S. Isabela    | 65         | 13.86 | 8.434          | 6.976    | 9.958    |
| <i>G. fortis</i>       | San Cristóbal | 101        | 13.21 | 8.562          | 7.378    | 9.788    |
| <i>G. fortis</i>       | Floreana      | 173        | 12.50 | 9.776          | 8.747    | 10.834   |
| <i>G. fortis</i>       | Daphne        | 26         | 10.67 | 6.823          | 4.902    | 8.875    |
| <i>G. fuliginosa</i>   | Pinta         | 43         | 7.70  | 5.727          | 4.500    | 7.021    |

|                           |                |     |       |       |       |        |
|---------------------------|----------------|-----|-------|-------|-------|--------|
| <i>G. fuliginosa</i>      | Marchena       | 19  | 7.40  | 5.338 | 3.541 | 7.276  |
| <i>G. fuliginosa</i>      | Santiago       | 18  | 8.02  | 2.606 | 1.700 | 3.584  |
| <i>G. fuliginosa</i>      | Rábida         | 10  | 8.19  | 5.189 | 2.561 | 8.077  |
| <i>G. fuliginosa</i>      | Seymour        | 41  | 8.22  | 4.367 | 3.407 | 5.381  |
| <i>G. fuliginosa</i>      | Santa Cruz     | 76  | 8.17  | 4.651 | 3.907 | 5.426  |
| <i>G. fuliginosa</i>      | Pinzón         | 73  | 8.13  | 3.506 | 2.921 | 4.115  |
| <i>G. fuliginosa</i>      | Fernandina     | 15  | 7.91  | 3.692 | 2.259 | 5.247  |
| <i>G. fuliginosa</i>      | N. Isabela     | 70  | 8.13  | 3.506 | 2.921 | 4.115  |
| <i>G. fuliginosa</i>      | S. Isabela     | 59  | 8.31  | 5.078 | 4.157 | 6.043  |
| <i>G. fuliginosa</i>      | Santa Fé       | 36  | 8.09  | 4.994 | 3.817 | 6.240  |
| <i>G. fuliginosa</i>      | San Cristóbal  | 112 | 8.08  | 5.446 | 4.730 | 6.185  |
| <i>G. fuliginosa</i>      | Española       | 30  | 8.28  | 4.034 | 2.985 | 5.150  |
| <i>G. fuliginosa</i>      | Gardner*       | 13  | 8.05  | 5.215 | 3.000 | 7.360  |
| <i>G. fuliginosa</i>      | Floreana       | 71  | 8.14  | 4.939 | 4.121 | 5.791  |
| <i>G. fuliginosa</i>      | Los Hermanos   | 11  | 9.55  | 8.398 | 4.416 | 12.761 |
| <i>G. septentrionalis</i> | Darwin         | 30  | 8.97  | 3.445 | 2.549 | 4.398  |
| <i>G. septentrionalis</i> | Wolf           | 60  | 8.28  | 3.961 | 3.249 | 4.707  |
| <i>G. acutirostris</i>    | Genovesa       | 48  | 7.91  | 4.147 | 3.307 | 5.029  |
| <i>G. difficilis</i>      | Pinta          | 17  | 8.51  | 3.408 | 2.182 | 4.734  |
| <i>G. difficilis</i>      | Santiago       | 39  | 9.35  | 3.401 | 2.633 | 4.212  |
| <i>G. difficilis</i>      | Santa Cruz     | 29  | 8.67  | 3.818 | 2.806 | 4.895  |
| <i>G. scandens</i>        | Pinta          | 16  | 9.68  | 4.742 | 2.973 | 6.658  |
| <i>G. scandens</i>        | Marchena*      | 22  | 10.49 | 4.988 | 3.445 | 6.644  |
| <i>G. scandens</i>        | Santiago       | 21  | 8.84  | 4.140 | 2.825 | 5.554  |
| <i>G. scandens</i>        | Rábida         | 12  | 9.22  | 3.200 | 1.768 | 4.764  |
| <i>G. scandens</i>        | Seymour        | 34  | 9.74  | 4.220 | 3.193 | 5.308  |
| <i>G. scandens</i>        | Santa Cruz     | 80  | 9.75  | 4.441 | 3.748 | 5.161  |
| <i>G. scandens</i>        | Pinzón*        | 14  | 9.52  | 5.089 | 3.028 | 7.333  |
| <i>G. scandens</i>        | S. Isabela     | 16  | 9.59  | 3.806 | 2.387 | 5.344  |
| <i>G. scandens</i>        | Santa Fe       | 50  | 10.11 | 4.768 | 3.823 | 5.760  |
| <i>G. scandens</i>        | San Cristóbal* | 12  | 9.54  | 2.943 | 1.626 | 4.382  |
| <i>G. scandens</i>        | Floreana       | 90  | 9.43  | 4.157 | 3.545 | 4.792  |
| <i>G. propinqua</i>       | Genovesa       | 40  | 12.98 | 7.381 | 5.737 | 9.116  |
| <i>G. conirostris</i>     | Española       | 80  | 15.97 | 6.913 | 5.835 | 8.034  |
| <i>G. conirostris</i>     | Gardner        | 67  | 15.05 | 7.395 | 6.136 | 8.710  |
| <i>P. crassirostris</i>   | Pinta          | 13  | 12.23 | 3.900 | 2.244 | 5.707  |
| <i>P. crassirostris</i>   | Marchena*      | 13  | 12.51 | 2.734 | 1.573 | 4.000  |
| <i>P. crassirostris</i>   | Santiago       | 13  | 12.79 | 3.839 | 2.209 | 5.617  |
| <i>P. crassirostris</i>   | Santa Cruz     | 23  | 12.31 | 2.746 | 1.918 | 3.634  |
| <i>P. crassirostris</i>   | S. Isabela     | 42  | 12.00 | 4.450 | 3.395 | 5.558  |
| <i>P. crassirostris</i>   | San Cristóbal  | 30  | 12.64 | 3.513 | 2.599 | 4.485  |
| <i>P. crassirostris</i>   | Floreana       | 15  | 12.60 | 3.786 | 2.316 | 5.381  |
| <i>P. inornata</i>        | Cocos          | 107 | 6.17  | 4.052 | 3.508 | 4.615  |
| <i>C. pauper</i>          | Floreana       | 66  | 8.83  | 4.858 | 4.025 | 5.729  |
| <i>C. heliobates</i>      | Isabela        | 29  | 8.15  | 3.423 | 2.516 | 4.389  |
| <i>C. psittacula</i>      | Pinta          | 16  | 10.40 | 4.019 | 2.520 | 5.644  |
| <i>C. psittacula</i>      | Marchena       | 20  | 10.54 | 3.055 | 2.057 | 4.130  |
| <i>C. psittacula</i>      | Santiago       | 12  | 11.15 | 6.018 | 3.326 | 8.961  |
| <i>C. psittacula</i>      | Santa Cruz*    | 17  | 10.11 | 5.883 | 3.767 | 8.172  |

|                      |               |    |       |       |       |       |
|----------------------|---------------|----|-------|-------|-------|-------|
| <i>C. psittacula</i> | N. Isabela*   | 10 | 9.30  | 3.795 | 1.873 | 5.906 |
| <i>C. psittacula</i> | S. Isabela    | 15 | 9.28  | 5.140 | 3.145 | 7.306 |
| <i>C. psittacula</i> | Floreana*     | 13 | 10.45 | 3.239 | 1.863 | 4.739 |
| <i>C. parvulus</i>   | Santiago      | 23 | 7.36  | 4.701 | 3.283 | 6.221 |
| <i>C. parvulus</i>   | Santa Cruz    | 12 | 7.32  | 4.426 | 2.446 | 6.591 |
| <i>C. parvulus</i>   | N. Isabela    | 10 | 7.42  | 5.418 | 2.674 | 8.432 |
| <i>C. parvulus</i>   | S. Isabela    | 16 | 7.56  | 4.312 | 2.704 | 6.055 |
| <i>C. parvulus</i>   | Floreana      | 54 | 7.51  | 3.782 | 3.062 | 4.536 |
| <i>C. parvulus</i>   | San Cristóbal | 71 | 7.91  | 4.185 | 3.492 | 4.907 |
| <i>C. pallidus</i>   | Santiago      | 9  | 9.29  | 3.068 | 1.392 | 4.914 |
| <i>C. pallidus</i>   | Santa Cruz*   | 18 | 8.80  | 3.042 | 1.984 | 4.183 |
| <i>C. pallidus</i>   | S. Isabela    | 48 | 8.12  | 4.926 | 3.929 | 5.974 |

1  
2  
3  
4  
5  
6  
7  
8  
9  
10  
11  
12  
13  
14  
15  
16  
17  
18  
19  
20  
21  
22  
23  
24  
25  
26  
27  
28  
29  
30  
31  
32

### Captions for databases S1 to S3

Database S1. Dataset for Fig 1 and Fig S1. Annual variation in the proportions of admixed individuals in the populations of *G. fortis* and *G. scandens* on Daphne Major Island.

Database S2. Dataset for statistical analysis. Proportions of admixed individuals in the populations of *G. fortis* and *G. scandens* produced in five years of extensive breeding on Daphne Major Island.

Database S3. Dataset for Figs 2, 3 and S3. Means, variances, coefficients of variation and skewness for annual samples of *G. fortis* and *G. scandens* on Daphne Major Island.

## 1 **References**

- 2 1. R. I. Bowman, "The evolution of song in Darwin's Finches" in *Patterns of*  
3 *Evolution in Galapagos Organisms*, R. I. Bowman, M. Berson, and A. E. Leviton,  
4 Eds. (Am. Assoc. Adv. Sci., Pacific Division, San Francisco, CA 1983), pp.237-  
5 537.
- 6 2. B. R. Grant, P. R. Grant, Cultural inheritance of song and its role in the evolution  
7 of Darwin's finches. *Evolution* **50**, 2471-2487 (1996).
- 8 3. P. R. Grant, B. R. Grant, Role of sexual imprinting and assortative mating in  
9 Darwin's finches. *Proc. Natl. Acad. Sci. USA* **115**, E10879-10887 (2018).
- 10 4. P. R. Grant, B. R. Grant, Hybridization, Sexual Imprinting, and Mate choice. *Am.*  
11 *Nat.* **149**, 1-28 (1997).
- 12 5. P. R. Grant, B. R. Grant, Adult sex ratio influences mate choice in Darwin's  
13 finches. *Proc. Natl. Acad. Sci. USA* **116**, 12373-12382 (2019).
- 14 6. P. R. Grant, B. R. Grant, Causes of lifetime fitness of Darwin's finches in a  
15 fluctuating environment. *Proc. Natl. Acad. Sci. USA* **108**, 674-679 (2011).
- 16 7. D. Lack, The Galapagos finches (Geospizinae): a study in variation. *Occasional*  
17 *Papers of the California Academy of Sciences* **21**, 1-159 (1945).
- 18 8. P. R. Grant, B. R. Grant, Unpredictable evolution in a 30-year study of Darwin's  
19 Finches. *Science* **296**, 707-711 (2002).
- 20 9. P. R. Grant, I. Abbott, D. Schluter, R. L. Curry, L. K. Abbott, Variation in the size  
21 and shape of Darwin's finches. *Biol. J. Linn. Soc.* **25**, 1-39 (1985).
- 22 10. R. I. Bowman, Morphological differentiation and adaptation in the Galapagos  
23 finches. *Univ. Calif. Publs. Zool.* **53**, 1-302 (1961).
- 24 11. P. R. Grant, *Ecology and Evolution of Darwin's finches*. (Princeton University  
25 Press, Princeton, 1986).
- 26 12. K. Petren, P. R. Grant, B. R. Grant, A. A. Clack, N. V. Lescano, Multilocus  
27 genotypes from Charles Darwin's finches: biodiversity lost since the voyage of  
28 the *Beagle*. *Philos. Trans. R. Soc. B* **365**, 1009-1018 (2010).

29

30
